# Supplementary material
Source: PubMed Central journal article supplement (PMC3157230)

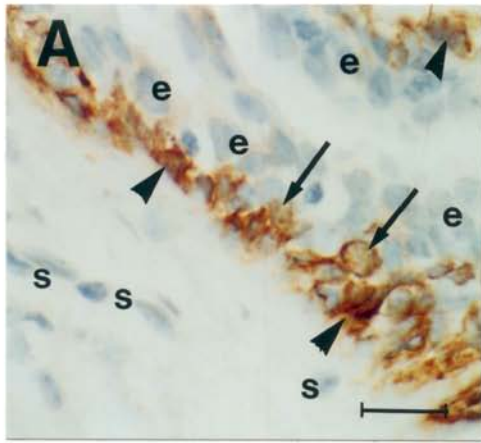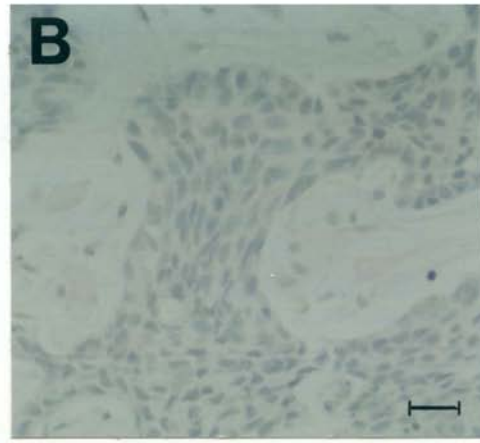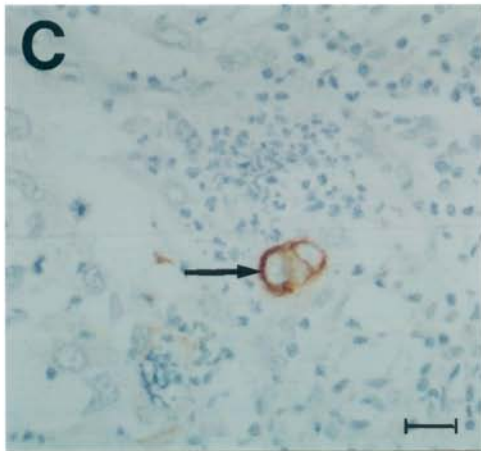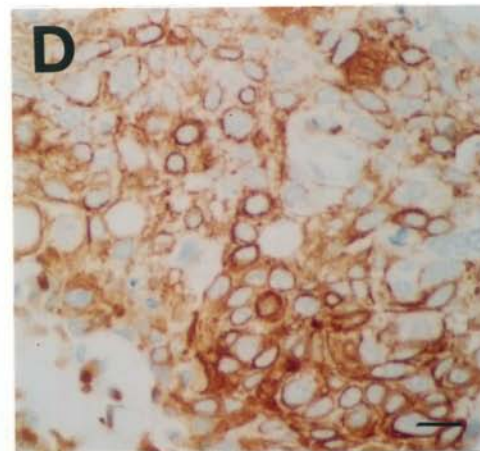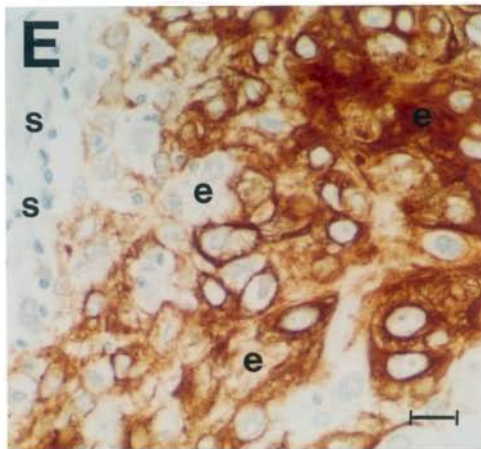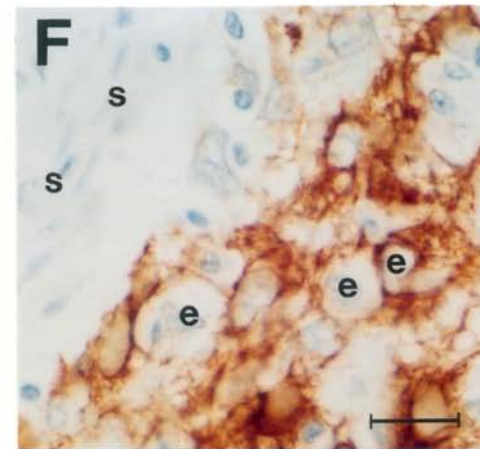

Supplemental Figure S1

Supplement: mmc1.pdf [file mmc1.pdf]

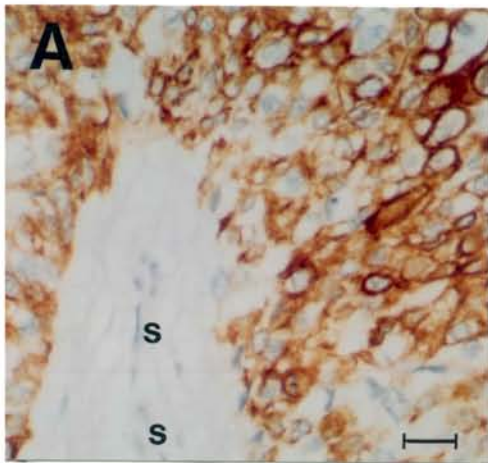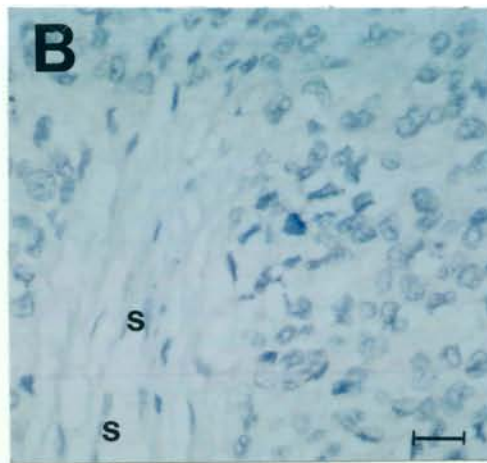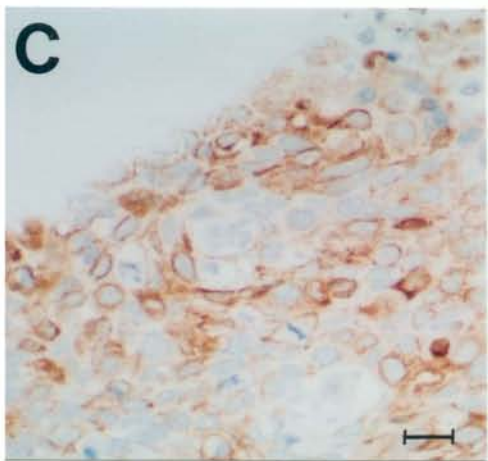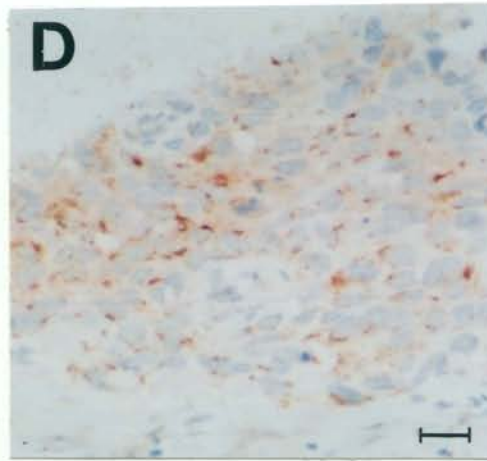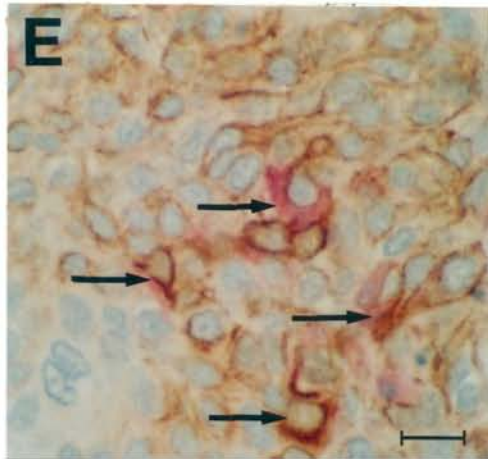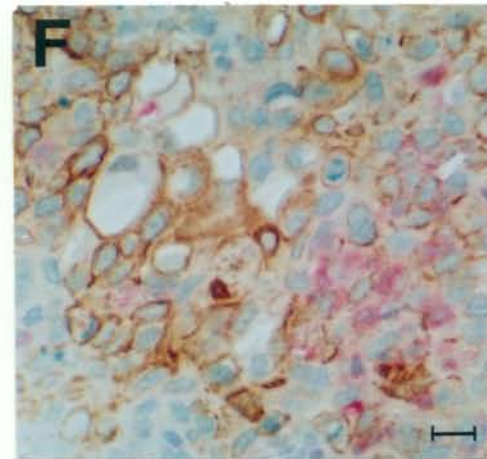

Supplemental Figure S2

Supplement: mmc2.pdf [file mmc2.pdf]

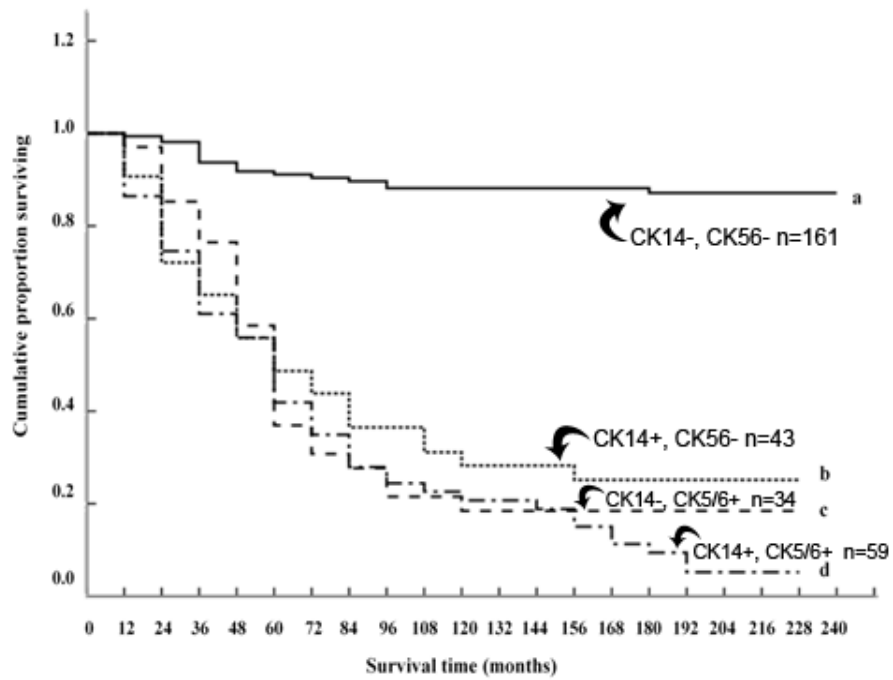

Supplemental Figure S3

Supplement: mmc3.pdf [file mmc3.pdf]
